# Supplementary material
Source: PubMed Central journal article supplement (PMC5021442)
Supplement: NIHMS815102-supplement-Supplemental.pdf [file NIHMS815102-supplement-Supplemental.pdf]

**Interlobular arteries from two-kidney, one-clip Goldblatt hypertensive rats exhibit impaired vasodilator response to epoxyeicosatrienoic acids**

Alexandra Sporková <sup>a</sup>, Ph.D., N. Rami Reddy, Ph.D.<sup>b</sup>, John R. Falck <sup>b</sup> Ph.D., John D. Imig <sup>c</sup>, Ph.D., Libor Kopkan <sup>a</sup>, DVM, Ph.D, Janusz Sadowski <sup>d</sup>, Ph.D., Luděk Červenka <sup>a,e</sup>, M.D., Ph.D.

<sup>a</sup> Center for Experimental Medicine, Institute for Clinical and Experimental Medicine, Prague, Czech Republic.

<sup>b</sup> Department of Biochemistry, University of Texas Southwestern Medical Center, Dallas, Texas, USA.

<sup>c</sup> Department of Pharmacology and Toxicology, Medical College of Wisconsin, Wisconsin, USA.

<sup>d</sup> Department of Renal and Body Fluid Physiology, M. Mossakowski Medical Research Centre, Polish Academy of Science, Warsaw, Poland.

<sup>e</sup> Department of Pathophysiology, 2<sup>nd</sup> Faculty of Medicine, Charles University, Prague, Czech Republic.

*Author for correspondence:*

Alexandra Sporková, Ph.D.

Center for Experimental Medicine, Institute for Clinical and Experimental Medicine, 1958/9 Vídeňská, CZ-140 00 Prague 4, Czech Republic.

+(420) 236055460, Email: alhc@medicon.cz

Sources of support: This study was principally supported by grant No. NT/14011-3 awarded by the Internal Grant Agency of the Ministry of Health to L.K. Institute for Clinical and Experimental Medicine (IKEM) is recipient of the project of the Ministry of Health of the Czech Republic for the development of research organization 00023001 (institutional support). The Center for Experimental Medicine (IKEM) received financial support from the European Commission within the Operational Program Prague–Competitiveness; project

“Rozvoj infrastruktury PEM” (#CZ.2.16/3.1.00/28025). J.D.I. was supported by NIH grant DK38226. J.R.F was supported by the Robert A. Welch Foundation (I-0011) and the USPHS NIH (DK38226, HL111392). A.S. was also supported by a Marie Curie Fellowship from the European Commission Program PEOPLE (IRG 247847).

**Declaration of interest:**

*The authors report no conflicts of interest. The authors alone are responsible for the content and writing of the paper.*

*Short title:* epoxyeicosatrienoic acids in 2K1C hypertension

**Abbreviations**

20-HETE; 20-hydroxyeicosatetraenoic acid

2K1C; 2-kidney, 1-clip Goldblatt hypertensive rat

ANG II; angiotensin II

BK<sub>Ca</sub>; large conductance potassium channel

BP; Blood pressure

DHETEs; Dihydroxyeicosatrienoic acids

EET; Epoxyeicosatrienoic acid

ESRD; End-stage renal disease

NO; nitric oxide

PE; Phenylephrine

RAS; Renin-angiotensin system

VSMC; Vascular smooth muscle

TRPC 3, TRCP 6; Transient receptor potential canonical channel 3 and 6

### **Abstract**

**Background:** Small renal arteries have a significant role in regulation of renal hemodynamics and blood pressure (BP). To study potential changes in regulation of vascular function in hypertension, we examined renal vasodilatory responses of small arteries from nonclipped

kidneys of the two-kidney, one-clip (2K1C) Goldblatt hypertensive rats to native epoxyeicosatrienoic acids (EETs) which are believed to be involved in regulation of renal vascular function and BP. Two newly synthesized EET analogs were also examined.

**Methods:** Renal interlobular arteries isolated from the nonclipped kidneys on day 28 after clipping were precontracted with phenylephrine (PE), pressurized, and the effects of a 14,15-EET analog, native 14,15-EET, and 11,12-ether-EET-8ZE, an analog of 11,12-EET, on the vascular diameter were determined and compared to the responses of arteries from the kidneys of sham-operated rats.

**Results:** In the arteries from non-clipped kidneys isolated in the maintenance phase of Goldblatt hypertension the maximal vasodilatory response to 14,15-EET analog was  $30.1 \pm 2.8\%$  versus  $49.8 \pm 7.2\%$  in sham-operated rats; the respective values for 11,12-ther-EET-8ZE were  $31.4 \pm 6.4\%$  versus  $80.4 \pm 6\%$ , and for native EETs they were  $41.7 \pm 6.6\%$  versus  $62.8 \pm 4.4\%$  ( $P \leq 0.05$  for each difference).

**Conclusions:** We propose that reduced vasodilatory action and decreased intrarenal bioavailability of EETs combined with intrarenal ANG II levels that are inappropriately high for hypertensive rats underlie functional derangements of the nonclipped kidneys of 2K1C Goldblatt hypertensive rats. These derangements could play an important role in pathophysiology of sustained BP elevation observed in this animal model of human renovascular hypertension.

**Key Words:** renovascular hypertension; two-kidney, one-clip Goldblatt hypertension; epoxyeicosatrienoic acids; vasodilatory responses.

## **Introduction**

The two-kidney, one-clip (2K1C) Goldblatt model of hypertension is an experimental paradigm for human renovascular hypertension. Previous studies demonstrated that increased activity of the renin-angiotensin system (RAS) plays a crucial role in the development of hypertension in this model [1-4]. However, recent studies have shown that

while plasma angiotensin II (ANG II) levels are elevated during the developmental phase of hypertension, later they normalize [2,5-7]. These findings indicate that enhancement of systemic RAS activity cannot be the exclusive causative factor of hypertension, especially during its maintenance phase. It has been suggested that in the stage of advanced 2K1C hypertension an interaction between RAS and other vasoactive system(s) in the nonclipped kidney must play an important pathophysiological role [8-11].

Particular attention in cardiovascular and renal research was focused on epoxyeicosatrienoic acids (EETs), the metabolites of cytochrome 450 (CYP) dependent epoxygenase pathway of arachidonic acid metabolism. It has been proposed that intrarenal EETs operate as an endogenous compensatory system with protective actions against increased RAS activity [7,10,17,19]. Recent studies have shown that during the maintenance phase of hypertension, the nonclipped kidney of 2K1C Goldblatt rats shows reduced availability of biologically active EETs as the result of increased conversion of EETs to biologically inactive dihydroxyeicosatrienoic acids (DHETs), an effect dependent on enhanced activity of soluble epoxide hydrolase (sEH) [10,11]. Based on these studies, it has been postulated that reduced intrarenal EETs bioavailability contributes to the derangement of the pressure-natriuresis relationship in the nonclipped kidney of 2K1C Goldblatt hypertension and, during the sustained phase of hypertension, plays an important pathophysiological role [7,10].

While the natriuretic action of EETs plays a major role in their antihypertensive properties, a direct vasodilatory effect of EETs on the renal circulation might be equally important, particularly in hypertension characterized by an imbalance between vasoconstrictor and vasodilatory influences [12-14]. EETs have been shown to counteract the usual renal arteriolar constriction in response to BP elevation as well as to attenuate the

vasoconstrictor effects of endothelin-1 [20,21]. In addition, EETs oppose renal vasoconstrictor actions of ANG II [22-25] and this effect might also occur in the arteries of the nonclipped kidneys of 2K1C hypertensive rats.

While beneficial hemodynamic effects of EETs were further emphasized in studies showing that pharmacological blockade of sEH is associated with improvement of renal blood flow [10], the responsiveness of hypertensive small renal arteries to EETs has never been studied. **Considering all the evidence available, we hypothesized that, in addition to the reduced intrarenal availability of EETs, the vasculature of the nonclipped kidney of 2K1C Goldblatt hypertensive rats exhibits impaired vasodilatory responsiveness to EETs.** Therefore, in the present study, we examined vasodilatory responses displayed by small arteries from the nonclipped kidneys of 2K1C hypertensive and sham-operated rats to native EETs and to two newly developed EET analogs that are resistant to oxidation and therefore exhibit a greater stability compared to native EETs.

## **Materials and Methods**

**The studies were performed in accordance with the guidelines and practices established by the Animal Care and Use Committees of the Institute for Clinical and Experimental Medicine and are in accordance with appropriate regulations in the Czech Republic and accord with the American Physiological Society Code of Practice for the Care**

and Use of Animals for Scientific Purposes. Hannover Sprague-Dawley (HanSD) rats were bred at the Center for Experimental Medicine.

Preparation of 2K1C Goldblatt Hypertensive Rats.

2K1C Goldblatt hypertension was induced as described previously [5,7]. Briefly, male HanSD rats (initial body weight 100 – 120 g) were anesthetized with a combination of tiletamine, zolazepam (Zoletil, 8 mg/kg), and xylazine (4 mg/kg, Rometar, Spofa, Czech Republic) which were administered intramuscularly. The right renal artery was isolated through a flank incision and a clip (0.25 mm internal diameter) was placed on the renal artery. Sham-operated rats underwent the same surgical procedure except placement of the arterial clip. Throughout the experiment, the animals were housed under conditions of constant temperature and humidity, maintained on a 12:12-h light-dark cycle, and fed standard chow, with tap water *ad libitum*. Arteries were isolated from the nonclipped kidney of 2K1C rats and from the left kidney of sham-operated rats. Only one well-reacting artery from one animal was used in each experiment. The average systolic blood pressure of our 2K1C rats was  $163 \pm 3$  mmHg and of sham-operated rats  $113 \pm 2$  mm Hg.

In vitro effects of 14,15-EET analog [disodium (S)-2-(13-(3-pentyl)ureido)-tridec-8(Z)-enamido)succinate] (EET-A); native 14,15-EET and 11,12-EET, and 11-nonyloxy-undec-8(Z)-enoic acid analog (11,12-ether-EET-8ZE) on vascular diameter of small renal arteries.

On or soon after day 28 post-surgery, when hypertension was established, animals were killed by an overdose of thiopental sodium. The non-clipped kidney was flushed, removed and placed in ice-cold physiological solution. Subsequently, the vessels were prepared as described in detail previously [26]. Briefly, the kidney was cut longitudinally into two to three sections from which interlobular arteries were dissected, isolated and cleared of adhering tubules and connective tissue. The diameter of the vessels was approximately 250  $\mu$ m. After



dissection, the arteries were cannulated with glass micropipettes in a pressure myograph chamber (Danish Myograph Company). Slowly, the intravascular pressure was raised at 10 mm Hg/min till 80 mm Hg while the vessels were perfused with oxygenated Krebs solution of the following composition (in mM): 117 NaCl, 4.7 KCl, 2.5 CaCl<sub>2</sub>, 1.2 MgCl<sub>2</sub>, 1.2 NaH<sub>2</sub>PO<sub>4</sub>, 25 NaHCO<sub>3</sub> and 11 glucose, at 37°C at a flow rate of about 2 ml.min<sup>-1</sup>. Subsequently, the mounted arteries were slowly pressurized to reach the intravascular pressure of 80 mmHg and equilibrated. The output of a black-and-white video camera attached to the microscope was fed to a frame grabber card mounted in a personal computer. Video images were analyzed using MioVIEW data acquisition software that continuously acquires the diameter measurements of the blood vessel. Drugs were added externally via superfusing Krebs solution. The effects of 14,15-EET analog, native 14,15-EET, and 11,12-ether-EET-8ZE, an analog of 11,12-EET, on the vascular diameter were determined after the vessels had been precontracted by submaximal concentration of phenylephrine (PE) (0.3-1.0 μM). In preliminary studies we found that the contraction produced by phenylephrine was more stable and reproducible compared to constriction produced by ANG II.

The chemical structure of 14,15-EET analog and 11,12-EET analog are depicted in Figure 1. These analogs are resistant to oxidation and degradation by sEH to DHETE [27,28]. 14,15-EET was purchased from Cayman Pharma (Neratovice, Czech Republic). EET-A and 11,12-ether-EET-8ZE were synthesized by Professor Falck's group [27,28].

Artery vasodilator responses are expressed as percent dilation of PE-precontracted vessels. Half-maximal effective agonist concentration (EC<sub>50</sub>) and maximal dilatory response (E<sub>max</sub>) were calculated from least squares fit of the individual agonist concentration-response curves using the following logistic function from Origin 8.5:

$$Y = \{[E_{\min} - E_{\max}] / [1 + (x/EC_{50})^n] + E_{\max}$$

where  $E_{min}$  is the minimum response and was constrained to zero and  $n$  is the slope factor.

### **Statistical Analysis**

All values are expressed as means  $\pm$  SEM. Graph-Pad Prism software (Graph Pad Software, San Diego, CA, USA) was used for statistical calculations. The differences between groups for  $E_{max}$  and  $EC_{50}$  were assessed by Student's two-tailed unpaired  $t$ -test. Values exceeding the 95% probability limits ( $P < 0.05$ ) were considered statistically significant.

### **Results**

Phenylephrine produced a stable constriction of interlobular renal arteries. As tested in the first experimental group, application of 1.0  $\mu$ M Phenylephrine produced 28.5 $\pm$ 5% constriction in sham arteries and 29  $\pm$  5 % constriction in 2K1C arteries. As shown in Figure 2A, PE-precontracted renal interlobular arteries from sham-operated and from 2K1C rats responded to application of the 14,15-EET analog with dose-dependent vasodilatation, however, in 2K1C rats, the dose-response curve to 14,15-EET was slightly shifted to the right.

Moreover,  $E_{\max}$  was significantly reduced in the arteries of the 2K1C rats as compared to sham-operated rats (Table 1). The absolute vessel diameter changes are shown in Figure 2B.

As shown in Figure 3A, PE-precontracted renal interlobular arteries from 2K1C rats exhibited a significantly smaller vasodilatory response to native endogenous 14,15-EET as compared with those of sham-operated rats;  $E_{\max}$  was significantly lower in the arteries of the 2K1C rats as compared to sham-operated rats (Table 1). In this experimental group, application of 1.0  $\mu\text{M}$  Phenylephrine induced 21.5 $\pm$ 7% constriction in the arteries of sham-operated rats and 22 $\pm$ 7.2% constriction in 2K1C arteries. Figure 3B shows the absolute diameter changes.

As shown in Figure 4A, PE-precontracted renal interlobular arteries from 2K1C rats showed substantially reduced vasodilatory responses to 11,12-ether-EET-8ZE, the 11,12-EET analog compared to arteries of sham-operated rats, and, again,  $E_{\max}$  was substantially lower in 2K1C rats as compared to sham-operated rats (Table 1). In this experimental group, application of 1.0  $\mu\text{M}$  Phenylephrine induced 33  $\pm$  5% constriction in sham-operated rat arteries and 27 $\pm$ 7 % constriction in 2K1C arteries. Figure 4B shows the absolute diameter changes.

## Discussion

The present study demonstrates that renal interlobular arteries isolated from the nonclipped kidneys of 2K1C Goldblatt hypertensive rats during the maintenance phase of hypertension exhibit markedly reduced vasodilator responses to both EET analogs and native EETs compared to arteries from kidneys of sham-operated control rats.

While the dose-response curve to the 14,15-EET analog was only slightly shifted to the right in the arteries of 2K1C hypertensive rats, the maximal dilatory response was in

these arteries significantly reduced. Vasodilatory responses to native 14,15-EET were also reduced. Of special interest is also the observation that renal vasodilatation induced by the 14,15-EET analog was significantly greater compared to native 14,15-EET, both in arteries isolated from kidneys of sham-operated and 2K1C rats. This observation strengthens the notion that the appropriate structural modifications of EETs can result in generation of EET analogs that, being more stable since they are not a substrate for sEH enzyme, exhibit more pronounced vascular actions compared to native EETs. Such observations enhance the analogs' potential therapeutic value [27,28].

Similarly to 14,15-EET, in the arteries isolated from the nonclipped kidneys of 2K1C rats we found attenuated vasodilator responses to the 11,12-EET analog. On the whole, these findings indicate that during the maintenance phase of hypertension renal arteries of the nonclipped kidneys of 2K1C rats are characterized by reduced vasodilator responsiveness to EETs.

While our data indicate that the vessels from 2K1C hypertensive rats exhibit reduced responsiveness to EETs, previous studies have also demonstrated impairment of the vasodilatory function of 2K1C arteries. Dilation to an NO donor or acetylcholine as well as  $\beta$ -adrenoreceptor-mediated vasorelaxation were found to be reduced in 2K1C hypertensive arteries [29,30]. This indicates that some general dysregulation of the mechanisms contributing to the attenuated hyperpolarization of VSMC might occur in 2K1C hypertensive vessels, resulting in decreased vasorelaxation in response to various dilatory agents.

Since during the maintenance phase of 2K1C hypertension the rats exhibit decreased intrarenal EET bioavailability in the nonclipped kidneys [7,10,11], it is likely that both decreased intrarenal EET and reduced vasodilatory responsiveness to EET contribute to the derangement of the pressure-natriuresis relationship in the nonclipped kidney of 2K1C

Goldblatt hypertension; such combined effect could play an important pathophysiological role during the sustained phase of hypertension [7,10]. This hypothesis offers a plausible explanation to the major mystery of 2K1C Goldblatt hypertension, i.e., the reason why the presumably normal nonclipped kidney does not, as postulated by Guyton, prevent development of hypertension in its sustained phase [1,2].

*What are the mechanism(s) responsible for the reduced vasodilator responsiveness of the arteries isolated from the nonclipped kidneys of 2K1C rats to EETs?*

It is well documented that EETs, in particular 11,12-EET and 14,15-EET isoforms, induce a direct renal arterial dilation through activation of large-conductance calcium-activated  $K^+$  channels ( $BK_{Ca}$ ) and hyperpolarization of vascular smooth muscle cells (VSMC) [12-14]. Thus, by regulating the activity of  $BK_{Ca}$ , EETs can directly control the membrane potential of VSMC and the vascular tone [12-14,17,19]. Therefore, one can hypothesize that a functional impairment of  $BK_{Ca}$  in the nonclipped kidneys of 2K1C rats is responsible for the reduction of vasodilatory responses to EETs. Indeed, it was reported that deficient activity of  $BK_{Ca}$  in the aorta of 2K1C rats contributed to the impaired acetylcholine-induced and nitric oxide (NO)-mediated vasorelaxation [26,27]. Changes in the expression of BK channel subunits have been suggested to play a significant role in alteration of vascular responses in a number of physiological and pathological conditions. Exploration of the involvement of BK channels in vasodilation and possible alterations of their function in hypertension would be a fascinating subject of a mechanistic study that is beyond the scope of our present work.

Another established mechanism by which EETs produce vasodilation is by activating small and intermediate  $K_{Ca}$  channels in endothelial cells through transient receptor potential canonical channels types 3 and 6 (TRPC3 and TRPC6) which promote VSMC hyperpolarization [15,16]. Changes in the function of these receptor channels in hypertension might also

contribute to diminished vasorelaxation to EETs. These receptor channels would also be an interesting target to look at in a mechanistic study.

It is evident that the mechanisms whereby EETs elicit vasodilatation are complex and an impairment of one or more of these mechanisms might be responsible for the reduced vasodilator responses in the nonclipped kidneys of 2K1C rats. In this regard, it is important to recognize that also the metabolites of CYP-dependent  $\omega$ -hydroxylase pathway of arachidonic acid, such as 20-hydroxyeicostetraenoic acid (20-HETE), play an important role in the regulation of renal and systemic vascular tone, sodium excretion and pathophysiology of hypertension [17,26, 31]. In our previous study, we found that the nonclipped kidney of 2K1C rats in the phase of sustained hypertension simultaneously exhibits decreased intrarenal EETs and increased 20-HETE levels as compared with the kidney of sham-operated animals [7]. Since it is well known that 20-HETE itself is a potent vasoconstrictor and also potentiates the vasoconstrictor response to ANG II [32,33], it is likely that complex alterations in CYP-derived metabolites of arachidonic acid in the nonclipped kidney contribute to the pathophysiology of Goldblatt hypertension during its sustained phase.

## **Conclusions**

In summary, we showed that during the maintenance phase of hypertension small arteries of the nonclipped kidneys of 2K1C Goldblatt hypertensive rats exhibit vasodilator responses to EETs that are distinctly reduced compared to arteries from sham-operated normotensive rats. This fact may have pronounced physiological implications in hypertension that is characterized by an increased action of vasoactive hormones and enhanced microvascular reactivity to multiple vasoconstrictors. The present study shows

that the increased vascular tone is not being compensated by the action of vasodilatory EETs. The attenuated EET-mediated vascular dilation could be partly responsible for reduced renal blood flow found in renovascular hypertension. Collectively, reduced vasodilatory action of EETs combined with decreased intrarenal EETs bioavailability and with intrarenal ANG II levels that are inappropriately high for hypertensive rats could importantly contribute to functional derangements of the nonclipped kidneys of 2K1C Goldblatt hypertensive rats. Such derangements might play an important role in the pathophysiology of sustained hypertension in this model of human renovascular hypertension.

## **References**

1. Ploth DW. Angiotensin-dependent renal mechanism in two-kidney, one-clip renal vascular hypertension. *Am J Physiol.* 1983; 245: F131-F141.
2. Navar LG, Zou L, Von Thun A, Wang CT, Imig JD, Mitchell KD. Unraveling the mystery of Goldblatt hypertension. *News Physiol Sci.* 1998; 13: 170-176.
3. Guan S, Fox K, Mitchell, Navar LG. Angiotensin and angiotensin converting enzyme tissue levels in two-kidney, one-clip hypertensive rats. *Hypertension.* 1992; 20: 763-767.

4. El-Dahr SS, Dipp S, Guan S, Navar LG. Renin, angiotensinogen, and kallikrein gene expression in two-kidney Goldblatt hypertensive rats. *Am J Hypertens*. 1993; 6: 914-919.
5. Cervenka L, Wang CT, Mitchell KD, Navar LG. Proximal tubular angiotensin II levels and renal functional responses to AT<sub>1</sub> receptor blockade in nonclipped kidneys of Goldblatt hypertensive rats. *Hypertension*. 1999; 33: 102-107.
6. Červenka L, Vaněčková I, Husková Z, Vaňourková Z, Erbanová M, Thumová M, Škaroupková P, Opočenský M, Malý J, Čertíková Chábová V, Tesař V, Bürgelová M, Viklický O, Teplan V, Želízko M, Kramer HJ, Navar LG. Pivotal role of AT<sub>1A</sub> receptors in the development of two-kidney, one-clip hypertension: study in AT<sub>1A</sub> receptor knockout mice. *J Hypertens*. 2008; 26: 1379-1389.
7. Walkowska A, Škaroupková P, Husková Z, Vaňourková Z, Čertíková Chábová V, Tesař V, Kramer HJ, Falck JR, Imig JD, Kompanovska-Jezierska E, Sadowski J, Červenka L. Intrarenal cytochrome P-450 metabolites of arachidonic acid in the regulation of the nonclipped kidney function in two-kidney, one-clip Goldblatt hypertensive rats. *J Hypertens*. 2010; 28: 582-593.
8. Mitchell KD, Botros FT, Navar LG. Intrarenal renin-angiotensin system and counteracting protective mechanisms in angiotensin II-dependent hypertension. *Acta Physiologica Hungarica* 2007; 94: 31-48.
9. Rakušan D, Bürgelová M, Vaněčková I, Vaňourková Z, Husková Z, Škaroupková P, Mrázová I, Opočenský M, Kramer HJ, Netuka I, Malý J, Alenina N, Bader M, Santos RAS, Červenka L. Knockout of angiotensin 1-7 receptor worsens the course of two-kidney, one-clip Goldblatt hypertension: roles of nitric oxide deficiency and enhanced vascular responsiveness to angiotensin II. *Kidney and Blood Press Res*. 2010; 33: 476-488.



10. Sporkova A, Kopkan L, Varcabová A, Husková Z, Hwang SH, Hammock BD, Imig JD, Kramer HJ, Červenka L. Role of cytochrome P450 metabolites in the regulation of renal function and blood pressure in 2-kidney, 1-clip hypertensive rats. *Am J Physiol.* 2011; 300: R1468-R1475.
11. Kopkan L, Husková Z, Sporková A, Varcabová Š, Honetschlägerová Z, Hwang SH, Tsai HJ, Hammock BD, Imig JD, Kramer HJ, Bürgelová M, Vojtíšková A, Kujal P, Vernerová Z, Červenka L. Soluble epoxide hydrolase inhibition exhibits antihypertensive actions independently on nitric oxide in mice with renovascular hypertension. *Kidney and Blood Press Res.* 2012; 35: 595-607.
12. Archer SL, Gragasin FS, Xichen W, Wang S, McMurtry, Kim DH, Platonov M, Koshal A, Kyoko Hashimoto, BSc; William B. Campbell WB, Falck JR, Michelakis ED. Endothelium-derived hyperpolarizing factor in human mammary artery is 11,12-Epoxyeicosatrienoic acid and causes relaxation by activating smooth muscle BKca channels. *Circulation.* 2003; 107: 769-776.
13. Li PL, Campbell WB. Epoxyeicosatrienoic acids activate K<sup>+</sup> channels in coronary smooth muscle through guanine nucleotide binding protein. *Circ Res.* 1998; 80:877-884.
14. Zou AP, Fleming JT, Falck JR, Jacobs ER, Gebremedhin D, Harder DR, Roman JR. Stereospecific effects of epoxyeicosatrienoic acids on renal vascular tone and K<sup>(+)</sup>-channel activity. *Am J Physiol.* 1996; 270:F822-832.
15. Fleming I, Rueben A, Popp R, Fisslthaler B, Schrodt S, Sander A, Haendeler J, Falck JR, Morisseau Ch, Hammock BD, Busse R. Epoxyeicosatrienoic acids regulate Trp channel dependent Ca<sup>2+</sup> signaling and hyperpolarization in endothelial cells. *Arterioscler Thromb Vasc Biol.* 2007; 27:2612-2618.

16. Madhun ZT, Goldthwait DA, McKay D, Hopfer U, Douglas JG. An epoxygenase metabolite of arachidonic acid mediates angiotensin II-induced rises in cytosolic calcium in rabbit proximal tubule epithelial cells. *J Clin Invest.* 1991; 88: 456-461.
17. Fan F, Muoya Y, Roman RJ. Cytochrome P450 eicosanoids in hypertension and renal disease. *Curr Opin Nephrol Hypertens* 2015; 24: 37-46.
18. Sakairi Y, Jacobson HR, Noland DT, Capdevila JH, Falck JR, Breyer MD. 5,6-EET inhibits ion transport in collecting duct by stimulating endogenous prostaglandin synthesis. *Am J Physiol.* 1995; 268: F931-F939.
19. Imig JD. Epoxides and soluble epoxide hydrolase in cardiovascular physiology. *Physiol Rev.* 2012; 92: 101-130.
20. Imig JD, Pham BT, LeBlanc EA, Falck JR, and Inscho EW. Cytochrome P450 and cyclooxygenase metabolites contribute to the endothelin-1 afferent arteriolar vasoconstrictor and calcium responses. *Hypertension* 2000; 35: 307-312.
21. Imig JD, Falck JR, and Inscho EW. Contribution of cytochrome P450 epoxygenase and hydroxylase pathways to afferent arteriolar autoregulatory responsiveness. *Br J Pharmacol.* 1999;127:1399-1405.
22. Elmarakby AA. Reno-protective mechanisms of epoxyeicosatrienoic acids in cardiovascular disease. *Am J Physiol.* 2012; 302: R321-R330.
23. Imig JD, Deichmann PC. Afferent arteriolar responses to ANG II involve activation of PLA<sub>2</sub> and modulation by lipoxygenase and P-450 pathways. *Am J Physiol.* 1997; 273: F274-F282.
24. Imig JD, Zhao X, Falck JR, Wei S, Capdevila JH. Enhanced renal microvascular reactivity to angiotensin II in hypertension is ameliorated by the sulfonimide analog of 11,12-epoxyeicosatrienoic acid. *J Hypertens.* 2001; 19: 983-992.

25. Kohagure K, Endo Y, Ito O, Arima S, Omata K, Ito S. Endogenous nitric oxide and epoxyeicosatrienoic acids modulate angiotensin II-induced constriction in the rabbit  $\alpha_1$  channel activation. *Clin Exp Pharmacol Physiol*. 2005; 32:478-481.
26. Amberg GC, Santana LF. Downregulation of BK channel beta1 subunit in genetic hypertension. *Circ Res*. 2003; 93:965-971.
27. Burnham MP, Johnson IT, Weston AH. Reduced  $Ca^{2+}$ -dependent activation of large-conductance  $Ca^{2+}$ -activated K channels from arteries of type 2 diabetic Zucker diabetic fatty rats. *Am J Physiol*. 2006; 290:H1520-H1527.
28. Roman RJ. P-450 metabolites of arachidonic acid in the control of cardiovascular function. *Phys Rev*. 2002; 82:131-185.
29. Fleming I. The pharmacology of the cytochrome P450 epoxygenase/soluble epoxide hydrolase axis in the vasculature and cardiovascular disease. *Pharmacol Rev*. 2014; 66: 1106-1140.
30. Alonso-Galicia M, Maier KG, Greene AS, Cowley AW, Roman RJ. Role of 20-hydroxyeicosatetraenoic acid in the renal and vasoconstrictor actions of angiotensin II. *Am J Physiol*. 2002; 283: R60-R68.
31. Williams JM, Murphy S, Burke M, Roman RJ. 20-hydroxyeicosatetraenoic acid: a new target for the treatment of hypertension. *J Cardiovasc Pharmacol*. 2010; 56: 336-344.
32. Alonso-Galicia M, Maier KG, Greene AS, Cowley AW, Roman RJ. Role of 20-hydroxyeicosatetraenoic acid in the renal and vasoconstrictor actions of angiotensin II. *Am J Physiol*. 2002; 283: R60-R68.
33. Joly E, Seqqat R, Flamion B, Caron N, Michal A, Imig JD, Kramp R. Increased renal vascular reactivity to angiotensin II after unilateral nephrectomy in the rat involves 20-HETE. *Am J Physiol*. 2006; 291, R977-R986.

### Figure Legends

**Figure 1.** (A) Chemical structure of sodium (S)-2-(Z)-(13-(3-pentyl)ureido)-tridec-8(Z)-enamido)succinate, an agonistic orally-active analog of 14,15-epoxyeicosatrienoic acid.

(B) Chemical structure of 11-nonyloxy-undec-8(Z)-enoic acid (11,12-ether-EET-8ZE), an analog of 11,12-epoxyeicosatrienoic acid.

**Figure 2.** Vasodilator effects of 14,15-epoxyeicosatrienoic acid analog (14,15-EET analog) (A) and 14,15-epoxyeicosatrienoic acid (14,15-EET) (B) in phenylephrine-precontracted renal interlobular arteries isolated from nonclipped kidneys of two-kidney, one-clip (2K1C) rats or from kidneys of sham-operated rats. \* $P < 0.05$  versus sham-operated rats at the same concentration. The graphs in the lower panel depict the absolute changes of the diameter.

**Figure 3.** Vasodilator effects of 11,12-epoxyeicosatrienoic acid analog (11,12-ether-EET-8ZE) in phenylephrine-precontracted renal interlobular arteries isolated from nonclipped kidneys of two-kidney, one-clip (2K1C) rats or from kidneys of sham-operated rats. \* $P < 0.05$  versus sham-operated rats at the same concentration. The graphs in the lower panel depict the absolute changes of the diameter.
